# Supplementary material
Source: publisher figshare collection journal article supplement (https://karger.figshare.com/ndownloader/files/13563512)
Supplement: Supplementary file 1 [file 13563512]

SUPPLEMENTAL MATERIAL

APPENDIX:

Included Hypertension Codes

401.0 Hypertension, malignant

401.1 Hypertension, benign

401.9 Hypertension, Unspecified

402.00 Hypertensive heart disease. Malignant

402.01 Malignant HTN heart disease with heart failure

402.90 Hypertensive heart disease

402.10 Hypertensive heart disease, benign

402.11 Hypertensive heart disease, benign, with heart failure

402.91 Hypertensive heart disease, with heart failure

403.00 Malignant hypertensive renal disease

**Supplemental Table 1. Univariate Competing Risk Regression Analysis for HTN**

|  | HR | 95%CI | P |
| --- | --- | --- | --- |
| Age | 1.04 | 1.03-1.06 | <0.001 |
| Gender* | 1.56 | 0.49-5.02 | 0.451 |
| Race**  Black  Missing | 1.65  0.73 | 1.07-2.55  0.57-0.94 | 0.023  0.016 |
| ISS | 1.01 | 1.00-1.02 | 0.016 |
| Mechanism†  GSW  Other | 0.76  1.22 | 0.55-1.04  0.67-2.24 | 0.085  0.514 |
| MAP‡  Low  High | 0.89  1.56 | 0.62-1.28  1.18-2.07 | 0.532  0.002 |
| Burn | 1.57 | 1.22-2.00 | <0.001 |
| AKI | 1.72 | 1.32-2.23 | <0.001 |
| Rhabdomyolysis†† | 1.30 | 1.03-1.64 | 0.029 |
| Log Creatine Kinase | 1.09 | 0.99-1.20 | 0.070 |
| *Reference group female  **Reference group non-black  †Reference group explosive  ‡Reference group normal  ††Defined as creatine kinase>5000 U/L  Abbreviations: HTN, hypertension; HR, hazard ratio; CI, confidence interval; ISS, injury severity score; GSW, gunshot wound; MAP, mean arterial blood pressure; AKI, acute kidney injury | | | |

**Supplemental Table 2. Multivariable Competing Risk Regression Analysis for HTN**

|  | HR | 95%CI | P |
| --- | --- | --- | --- |
| Age | 1.04 | 1.02-1.06 | <0.001 |
| Race*  Black  Missing | 1.39  0.81 | 0.90-2.16  0.63-1.06 | 0.142  0.125 |
| ISS | 1.01 | 1.00-1.02 | 0.183 |
| Mechanism**  GSW  Other | 0.92  1.21 | 0.66-1.27  0.65-2.24 | 0.601  0.549 |
| MAP†  Low  High | 0.80  1.53 | 0.55-1.15  1.15-2.04 | 0.222  0.004 |
| Burn | 1.43 | 1.10-1.84 | 0.007 |
| AKI | 1.42 | 1.08-1.86 | 0.011 |
| Rhabdomyolysis†† | 1.27 | 0.99-1.62 | 0.058 |
| *Reference group non-black  **Reference group explosive  †Reference group normal  †† Defined as creatine kinase>5000 U/L  Abbreviations: HTN, hypertension; HR, hazard ratio; CI, confidence interval; ISS, injury severity score; GSW, gunshot wound; MAP, mean arterial blood pressure; AKI, acute kidney injury | | | |

**Supplemental Table 3. Multivariable Competing Risk Regression Analysis for HTN**

|  | HR | 95%CI | P |
| --- | --- | --- | --- |
| Age | 1.04 | 1.02-1.06 | <0.001 |
| Race*  Black  Missing | 1.38  0.81 | 0.89-2.16  0.63-1.06 | 0.153  0.121 |
| ISS | 1.01 | 1.00-1.02 | 0.193 |
| Mechanism**  GSW  Other | 0.92  1.24 | 0.66-1.28  0.67-2.30 | 0.610  0.496 |
| MAP†  Low  High | 0.81  1.49 | 0.56-1.17  1.11-1.98 | 0.270  0.007 |
| Burn | 1.44 | 1.11-1.87 | 0.006 |
| AKI | 1.44 | 1.10-1.88 | 0.009 |
| Log Creatine Kinase | 1.07 | 0.96-1.18 | 0.201 |
| *Reference group non-black  **Reference group explosive  †Reference group normal  Abbreviations: HTN, hypertension; HR, hazard ratio; CI, confidence interval; ISS, injury severity score; GSW, gunshot wound; MAP, mean arterial blood pressure; AKI, acute kidney injury | | | |
